# Supplementary material
Source: Royal Society of Chemistry journal article supplement (doi:10.1039/d5ta09987k)
Supplement: d5ta09987k1.pdf [file d5ta09987k1.pdf]

## Methyl Propionate-Dominant Electrolyte for Enhanced Kinetics and Low-Temperature Performance of Prussian Blue Analogue Rechargeable Sodium-Ion Batteries

Qiancheng Du, Jiaqi Sun, Varun Kumar Singh, Dhinesh Subramanian, Yanbo Zhang, Huarong Zhang,\* Yang Zhang \*

*School of Physics and Electronics, Henan University, Kaifeng, Henan 475004, China*

In this study, we focus on modifying the interface using methyl propionate (MP)-based electrolytes to reduce the thickness of the cathode electrolyte interphase (CEI) and to improve both the stability and rate capacity. The results of our work are compared with those of previous studies, which are listed below.

**Table 1** Electrochemical properties of PBA-sodium-ion batteries with various designs

| Electrode                                            | Electrolyte                                                           | Specific capacity (mAh g <sup>-1</sup> ) | Wide-Temp. Performance: Capacity retention, cycle @ C (°C)             | Ref.             |
|------------------------------------------------------|-----------------------------------------------------------------------|------------------------------------------|------------------------------------------------------------------------|------------------|
| PBA  Na (fluorine-rich CEI)                          | 1 M NaPF <sub>6</sub> in MP /FEC (9:1)                                | 155 @0.1C                                | 80.57%, 100@ 1C (50°C); 83.4%, 200@ 1C (25°C); 86.68%, 300@ 1C (-20°C) | <b>This work</b> |
| PBA  Na (Cs <sup>+</sup> /Zn <sup>2+</sup> co-doped) | 1 M NaClO <sub>4</sub> in EC/DEC (1:1), 8% FEC                        | 108 @5C (-20°C)                          | 79.63%, 5400@5C (-20°C)                                                | [1]              |
| FePB  HC (FePB@S-CEI)                                | 1 M NaClO <sub>4</sub> in EC/DEC (1:1), 2 % 1-propene-1,3sultone (PS) | 124@0.1C                                 | 92.7%, 400@1C (0°C) 80.7%, 400@1C (60°C)                               | [2]              |
| FeVO-PBA  Na                                         | 1 M NaPF <sub>6</sub> in                                              | 148.9@0.5C                               | 92.6%, 400@ 5C (60°C);                                                 | [3]              |

|                                                                    |                                                              |                              |                                                                                                |      |
|--------------------------------------------------------------------|--------------------------------------------------------------|------------------------------|------------------------------------------------------------------------------------------------|------|
|                                                                    | DEG-DME                                                      |                              | ~100%, 300@ 1C (-30°C)                                                                         |      |
| I-PB  Na<br>(ice-assisted)                                         | 1 M NaClO <sub>4</sub> in<br>EC/DEC (1:1), 4%<br>FEC         | 123@15 mA g <sup>-1</sup>    | 72.6%, 100@ 150 mA g <sup>-1</sup><br>(60°C);<br>~100%, 100@ 150 mA g <sup>-1</sup><br>(-10°C) | [4]  |
| M5-<br>PBA  HC (M=<br>Mn, Fe, Co, Ni,<br>Cu)                       | 1 M NaClO <sub>4</sub> in<br>EC:PC:FEC (47.5:<br>47.5:5)     | 142.4@0.1C                   | 82.9%, 500@ 1C (30°C);                                                                         | [5]  |
| M-BA  Na                                                           | 1 M NaClO <sub>4</sub> in<br>EC/DEC (1:1), 5%<br>FEC         | 131.1@0.1C                   | 94.8%, 200@ 1C (25°C)                                                                          | [6]  |
| FeNi-<br>MnHCF  Na                                                 | 1 M NaPF <sub>6</sub> in<br>PC/EMC, 4%<br>/FEC+1 wt%<br>ETFA | 107.1@0.1C                   | 92.1%, 1120@(1C, 77.4 mAhg <sup>-1</sup><br>(-20°C)                                            | [7]  |
| Na <sub>2</sub> Fe[Fe(CN) <sub>6</sub> ]<br>·2H <sub>2</sub> O  Na | 1 M NaPF <sub>6</sub> in<br>tetraglyme                       | 145@0.1C                     | >70%, 140@30 mA g <sup>-1</sup> (25°C)                                                         | [8]  |
| NiMnFe-<br>PBA  Na                                                 | 1 M NaClO <sub>4</sub> in PC,<br>5% FEC                      | 122.8@10 mA g <sup>-1</sup>  | 71.35%, 300@100 mA g <sup>-1</sup><br>(25°C)                                                   | [9]  |
| NaKMnHCF  Na                                                       | 1 M NaClO <sub>4</sub> in PC,<br>5% FEC                      | 129.3@10 mA g <sup>-1</sup>  | 77.0%, 500@500 mA g <sup>-1</sup> (25°C)                                                       | [10] |
| Zn-substituted<br>Fe- PBA  Na                                      | 1 M NaPF <sub>6</sub> in<br>EC/DEC (1:1)                     | 114.56@10 mA g <sup>-1</sup> | 80.27%, 350@200 mA g <sup>-1</sup><br>(25°C)                                                   | [11] |
| NaMnHCF  Na                                                        | 1 M NaPF <sub>6</sub> in<br>PC/EC (1:1), 10%<br>FEC          | 159.2 @0.1C                  | 90%, 300@350 mA g <sup>-1</sup> (25°C);<br>65%, 300@0.5C (-20°C)                               | [12] |

EC: Ethylene carbonate; DEC: Diethyl carbonate; FEC: Fluoroethylene carbonate; PC: propylene carbonate; ETFA: 2,2,2-trifluoroethyl acetate; EMC: ethyl methyl carbonate

## References

- [1] H. Zhao, Y. Hao, Y. Zhang, Y. Gu, The low-temperature performance of sodium-ion batteries featuring Cs<sup>+</sup>/Zn<sup>2+</sup> co-doped Prussian blue analogues as cathode materials, *Journal of Power Sources* 630 (2025) 236075. <https://doi.org/10.1016/j.jpowsour.2024.236075>.
- [2] Q. Xia, C.-L. Ko, Y. Fan, H. Liu, Y. Lei, Z. Xu, Z. Shao, I. Gentle, R. Knibbe, Interfacial Orbital Hybridization Derived Robust Cathode-Electrolyte Interphase Enables Exceptional Sodium-Ion Storage Performance, *ACS Nano* 19 (2025) 40902–40916. <https://doi.org/10.1021/acsnano.5c12225>.
- [3] Z. Jing, L. Kong, M. Mamoor, L. Wang, B. Zhang, B. Wang, Y. Zhai, F. Wang, G.

- Qu, Y. Kong, D. Wang, L. Xu, Rational Design of Prussian Blue Analogues for Ultralong and Wide-Temperature-Range Sodium-Ion Batteries, *J. Am. Chem. Soc.* 147 (2025) 3702–3713. <https://doi.org/10.1021/jacs.4c16031>.
- [4] J. Peng, W. Zhang, Z. Hu, L. Zhao, C. Wu, G. Peleckis, Q. Gu, J.-Z. Wang, H.K. Liu, S.X. Dou, S. Chou, Ice-Assisted Synthesis of Highly Crystallized Prussian Blue Analogues for All-Climate and Long-Calendar-Life Sodium Ion Batteries, *Nano Lett.* 22 (2022) 1302–1310. <https://doi.org/10.1021/acs.nanolett.1c04492>.
- [5] Y. Wang, J. Yan, B. Xie, Y. Meng, C. Fu, F. Kong, X. Wang, Q. Zhou, X. Chen, J. Li, C. Du, L. Wang, P. Zuo, Tuning Cyanide Coordination Electronic Structure Enables Stable Prussian Blue Analogues for Sodium-ion Batteries, *Nat Commun* 16 (2025) 10083. <https://doi.org/10.21203/rs.3.rs-5878834/v1>.
- [6] W. Yu, K. Wang, R. Xu, M. Wu, C. Liu, X. Su, Sodium-Rich Prussian Blue Analogs Synthesized with Reducing Sodium Salt for Enhanced Rate and Cycling Stability Sodium-Ion Storage, *ACS Appl. Mater. Interfaces* 17 (2025) 7870–7880. <https://doi.org/10.1021/acsami.4c20346>.
- [7] X. Zhang, Z. Xu, J. Xie, Y. Lu, S. Liu, X. Xu, J. Tu, B. Xu, X. Zhao, Nanoarchitectonics for a long-life and robust Na-ion battery at low temperature with Prussian blue cathode and low-concentration electrolyte, *Journal of Energy Storage* 80 (2024) 110263. <https://doi.org/10.1016/j.est.2023.110263>.
- [8] V. Shipitsyn, W. Zuo, T.-N. Tran, T. Li, S. Lee, C.M. Chak, P.M. Le, L. Ma, Electronic Structure and Safety Insights into Prussian Blue Analog Cathode Behavior at Elevated Temperatures in Sodium-Ion Batteries, *Energy Fuels* 39 (2025) 19054–19059. <https://doi.org/10.1021/acs.energyfuels.5c03083>.
- [9] X. Wang, M. Zhao, W. Du, C. Zhang, W. Li, C. Yang, Y. Liu, Boosting ultralong lifespan of Fe-based Prussian blue analogs cathode via element doping and crystal water capture, *Chemical Engineering Journal* 508 (2025) 160997. <https://doi.org/10.1016/j.cej.2025.160997>.
- [10] L. Xu, Y. Liu, M. Chen, W. Wu, S. Qiu, H. Wu, M. Zheng, X. Zhang, X. Wu, Suppressing vacancies and crystal water of sodium manganese iron-based Prussian blue analogue by potassium doping for advanced sodium-ion batteries, *Chemical Engineering Science* 302 (2025) 120848. <https://doi.org/10.1016/j.ces.2024.120848>.
- [11] K. Lin, Z. He, L. Shen, J. Su, Z. Huang, Y. Xia, Y. Wang, Zinc-substituted Fe-based Prussian blue analogues induce a weak Jahn-Teller effect to enhance stability of sodium ion batteries, *Journal of Energy Storage* 90 (2024) 111924. <https://doi.org/10.1016/j.est.2024.111924>.
- [12] X. Ding, Q. Zhou, Z. Wang, L. Liu, Y. Wang, T. Song, F. Wu, H. Gao, An ultra-stable Mn-based Prussian blue compound effectively suppresses Jahn–Teller distortion as a superior cathode material for sodium-ion batteries, *J. Mater. Chem. A* 12 (2024) 27598–27609. <https://doi.org/10.1039/D4TA05525J>.
