# Supplementary material
Source: Royal Society of Chemistry journal article supplement (doi:10.1039/d5ta09987k)
Supplement: d5ta09987k2.pdf [file d5ta09987k2.pdf]

## Supporting Information

### **Methyl Propionate–Dominant Electrolyte for Enhanced Kinetics and Low-Temperature Performance of Prussian Blue Analogue Rechargeable Sodium-Ion Batteries**

Qiancheng Du, Jiaqi Sun, Varun Kumar Singh, Dhinesh Subramanian, Yanbo Zhang,

Huarong Zhang,\* Yang Zhang\*

*School of Physics and Electronics, Henan University, Kaifeng, Henan 475004, China*

\*Corresponding authors.

*E-mail:* [zhanghr@henu.edu.cn](mailto:zhanghr@henu.edu.cn) (H. Zhang); [yzhang@henu.edu.cn](mailto:yzhang@henu.edu.cn) (Y. Zhang)

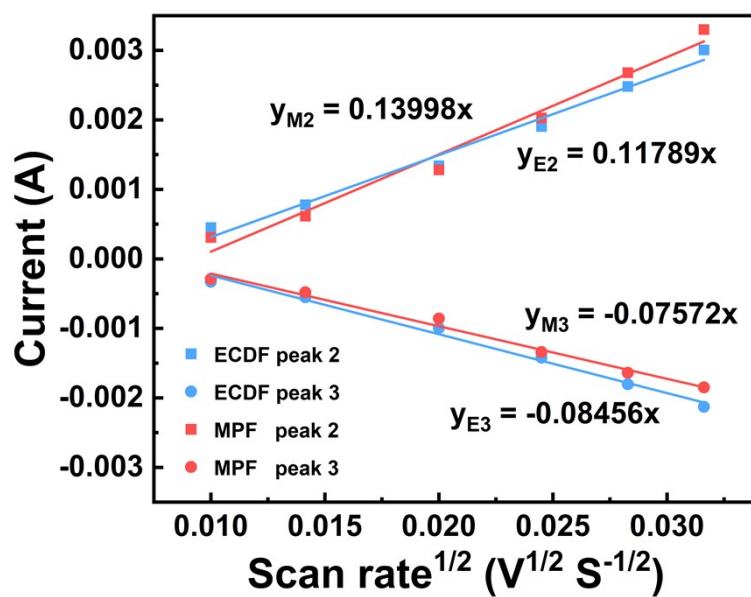

**Fig. S1.** PBA|ECDF|Na and PBA|MPF|Na half-cells linear relationship between current and  $v^{1/2}$  (scan rate)

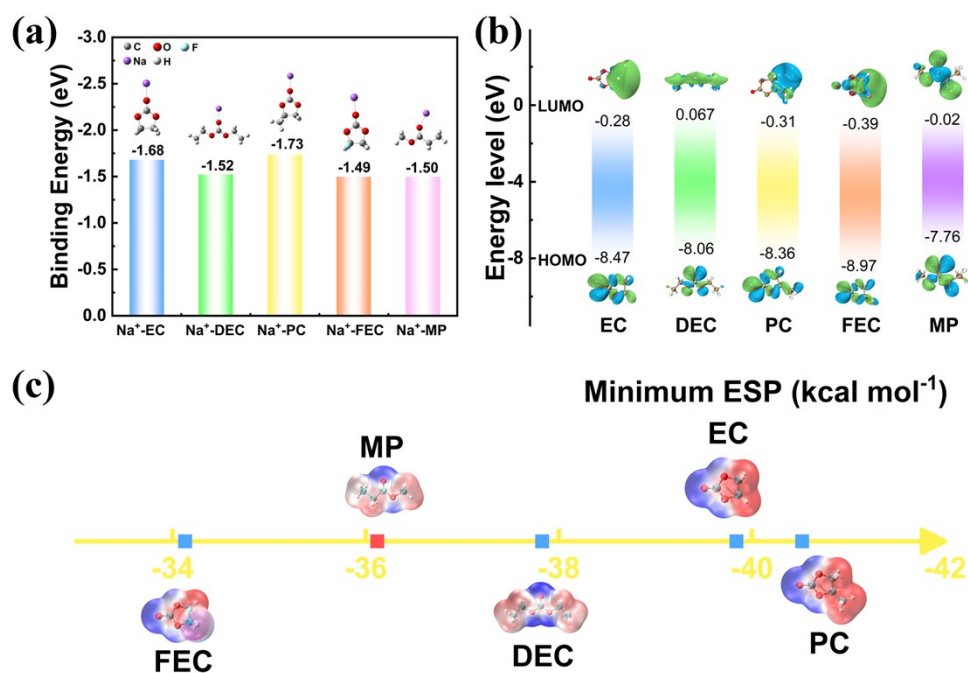

**Fig. S2.** DFT calculations. (a) Binding energies and corresponding structural models of different solvents with Na<sup>+</sup>. (b) HOMO and LUMO energy levels of different solvents. (c) ESP<sub>min</sub> values of various solvents.

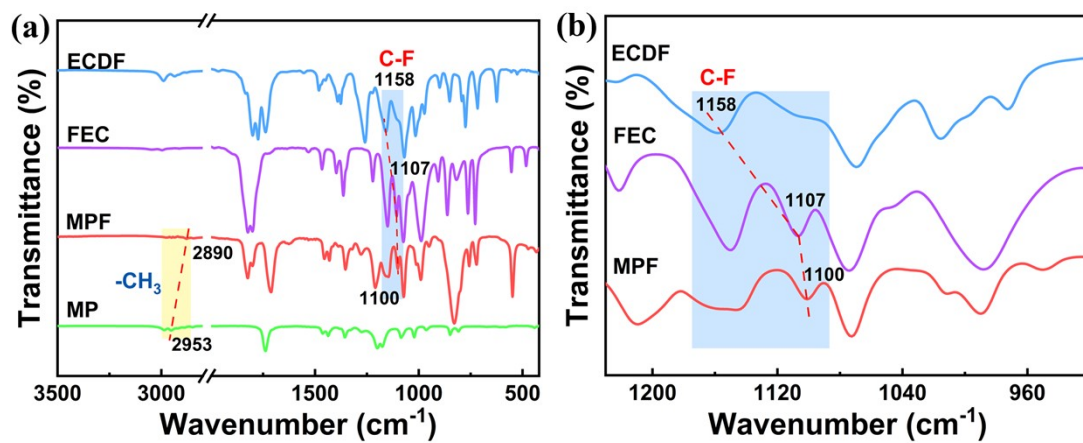

**Fig. S3.** (a) FTIR spectra of individual solvents and their various combinations, and (d) their local enlarged view.

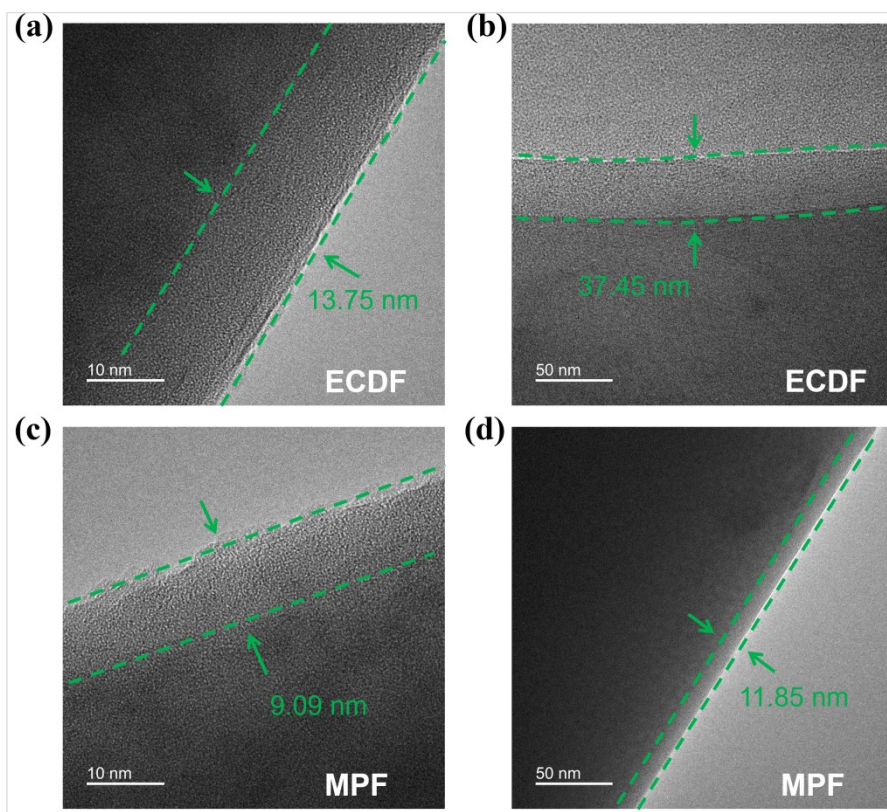

**Fig. S4.** TEM image of cycled PBA cathode in (a, b) ECDF electrolyte and (c, d) MPF electrolyte.

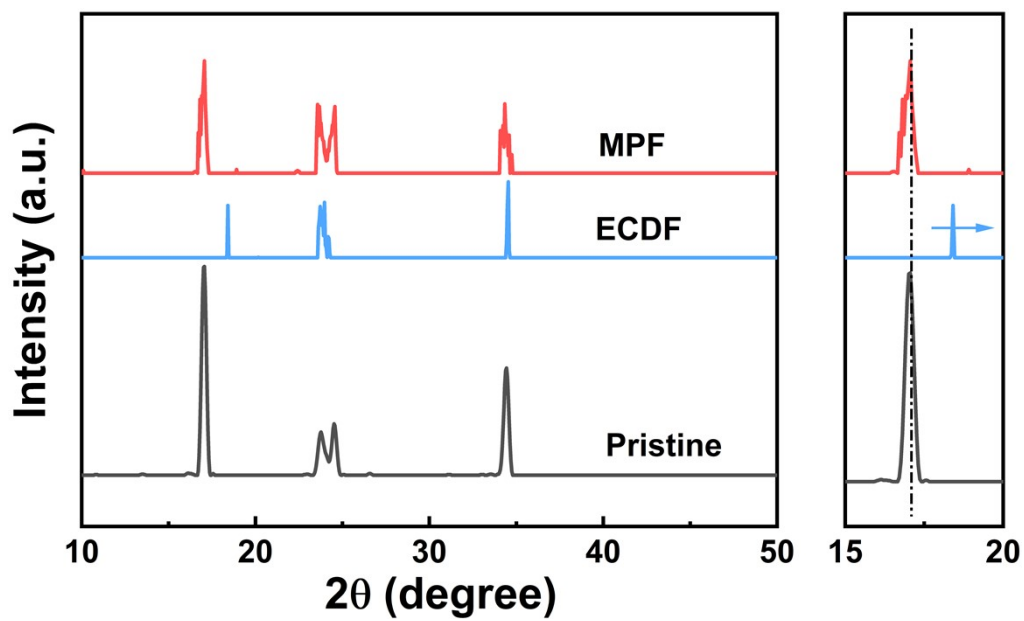

**Fig. S5.** Comparison of XRD patterns for the PBA cathode in its initial state and after cycling.

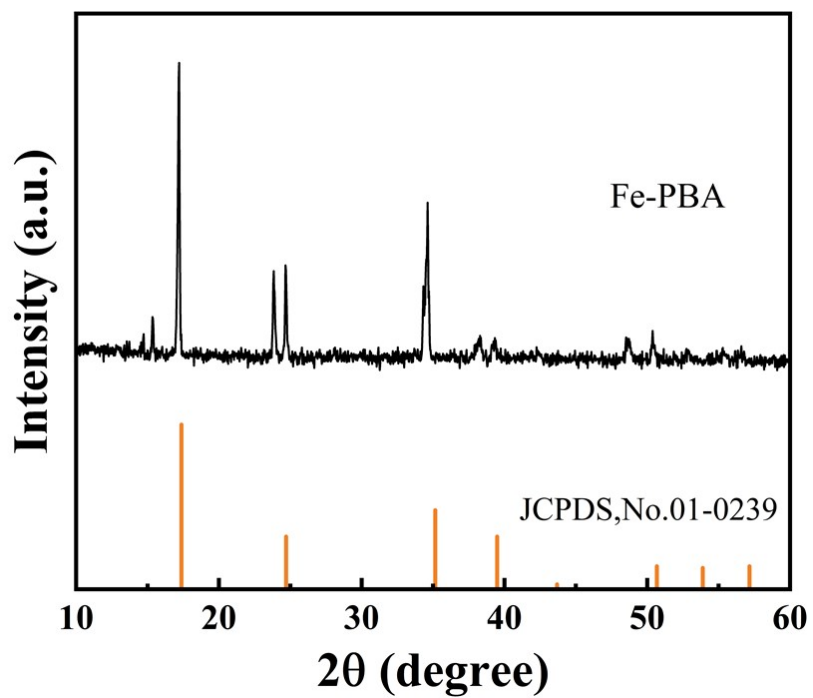

**Fig. S6.** XRD pattern of the as-synthesized Fe-PBA cathode material.

**Table S1** Electrochemical properties of PBA-sodium-ion batteries with various designs

| Electrode                                                      | Electrolyte                                                           | Specific capacity (mAh g <sup>-1</sup> ) | Wide-Temp. Performance: Capacity retention, cycle @ C (°C)                            | Ref.      |
|----------------------------------------------------------------|-----------------------------------------------------------------------|------------------------------------------|---------------------------------------------------------------------------------------|-----------|
| PBA  Na (fluorine-rich CEI)                                    | 1 M NaPF <sub>6</sub> in MP /FEC (9:1)                                | 155 @1C                                  | 80.57%, 100@ 1C (50°C); 83.4%, 200@ 1C (25°C); 86.68%, 300@ 1C (-20°C)                | This work |
| PBA  Na (Cs <sup>+</sup> /Zn <sup>2+</sup> co-doped)           | 1 M NaClO <sub>4</sub> in EC/DEC (1:1), 8% FEC                        | 108 @5C (-20°C)                          | 79.63%, 5400@5C (-20°C)                                                               | [1]       |
| FePB  HC (FePB@S-CEI)                                          | 1 M NaClO <sub>4</sub> in EC/DEC (1:1), 2 % 1-propene-1,3sultone (PS) | 124@0.1C                                 | 92.7%, 400@1C (0°C) 80.7%, 400@1C (60°C)                                              | [2]       |
| FeVO-PBA  Na                                                   | 1 M NaPF <sub>6</sub> in DEG-DME                                      | 148.9@0.5C                               | 92.6%, 400@ 5C (60°C); ~100%, 300@ 1C (-30°C)                                         | [3]       |
| I-PB  Na (ice-assisted)                                        | 1 M NaClO <sub>4</sub> in EC/DEC (1:1), 4% FEC                        | 123@15 mA g <sup>-1</sup>                | 72.6%, 100@ 150 mA g <sup>-1</sup> (60°C); ~100%, 100@ 150 mA g <sup>-1</sup> (-10°C) | [4]       |
| M5-PBA  HC (M=Mn, Fe, Co, Ni, Cu)                              | 1 M NaClO <sub>4</sub> in EC:PC:FEC (47.5 :47.5:5)                    | 142.4@0.1C                               | 82.9%, 500@ 1C (30°C);                                                                | [5]       |
| M-BA  Na                                                       | 1 M NaClO <sub>4</sub> in EC/DEC (1:1), 5% FEC                        | 131.1@0.1C                               | 94.8%, 200@ 1C (25°C)                                                                 | [6]       |
| FeNi-MnHCF  Na                                                 | 1 M NaPF <sub>6</sub> in PC/EMC, 4% /FEC+1 wt% ETFA                   | 107.1@0.1C                               | 92.1%, 1120@(1C, 77.4 mAhg <sup>-1</sup> (-20°C)                                      | [7]       |
| Na <sub>2</sub> Fe[Fe(CN) <sub>6</sub> ]·2H <sub>2</sub> O  Na | 1 M NaPF <sub>6</sub> in tetraglyme                                   | 145@0.1C                                 | >70%, 140@30 mA g <sup>-1</sup> (25°C)                                                | [8]       |
| NiMnFe-PBA  Na                                                 | 1 M NaClO <sub>4</sub> in PC, 5% FEC                                  | 122.8@10 mA g <sup>-1</sup>              | 71.35%, 300@100 mA g <sup>-1</sup> (25°C)                                             | [9]       |
| NaKMhCF  Na                                                    | 1 M NaClO <sub>4</sub> in PC, 5% FEC                                  | 129.3@10 mA g <sup>-1</sup>              | 77.0%, 500@500 mA g <sup>-1</sup> (25°C)                                              | [10]      |
| Zn-substituted Fe- PBA  Na                                     | 1 M NaPF <sub>6</sub> in EC/DEC (1:1)                                 | 114.56@10 mA g <sup>-1</sup>             | 80.27%, 350@200 mA g <sup>-1</sup> (25°C)                                             | [11]      |
| NaMHCF  Na                                                     | 1 M NaPF <sub>6</sub> in PC/EC (1:1),                                 | 159.2 @0.1C                              | 90%, 300@350 mA g <sup>-1</sup> (25°C); 65%, 300@0.5C (-20°C)                         | [12]      |

**References**

- [1] H. Zhao, Y. Hao, Y. Zhang, Y. Gu, The low-temperature performance of sodium-ion batteries featuring Cs<sup>+</sup>/Zn<sup>2+</sup> co-doped Prussian blue analogues as cathode materials, *Journal of Power Sources* 630 (2025) 236075. <https://doi.org/10.1016/j.jpowsour.2024.236075>.
- [2] Q. Xia, C.-L. Ko, Y. Fan, H. Liu, Y. Lei, Z. Xu, Z. Shao, I. Gentle, R. Knibbe, Interfacial Orbital Hybridization Derived Robust Cathode-Electrolyte Interphase Enables Exceptional Sodium-Ion Storage Performance, *ACS Nano* 19 (2025) 40902–40916. <https://doi.org/10.1021/acsnano.5c12225>.
- [3] Z. Jing, L. Kong, M. Mamoor, L. Wang, B. Zhang, B. Wang, Y. Zhai, F. Wang, G. Qu, Y. Kong, D. Wang, L. Xu, Rational Design of Prussian Blue Analogues for Ultralong and Wide-Temperature-Range Sodium-Ion Batteries, *J. Am. Chem. Soc.* 147 (2025) 3702–3713. <https://doi.org/10.1021/jacs.4c16031>.
- [4] J. Peng, W. Zhang, Z. Hu, L. Zhao, C. Wu, G. Peleckis, Q. Gu, J.-Z. Wang, H.K. Liu, S.X. Dou, S. Chou, Ice-Assisted Synthesis of Highly Crystallized Prussian Blue Analogues for All-Climate and Long-Calendar-Life Sodium Ion Batteries, *Nano Lett.* 22 (2022) 1302–1310. <https://doi.org/10.1021/acs.nanolett.1c04492>.
- [5] Y. Wang, J. Yan, B. Xie, Y. Meng, C. Fu, F. Kong, X. Wang, Q. Zhou, X. Chen, J. Li, C. Du, L. Wang, P. Zuo, Tuning Cyanide Coordination Electronic Structure Enables Stable Prussian Blue Analogues for Sodium-ion Batteries, *Nat Commun* 16 (2025) 10083. <https://doi.org/10.21203/rs.3.rs-5878834/v1>.
- [6] W. Yu, K. Wang, R. Xu, M. Wu, C. Liu, X. Su, Sodium-Rich Prussian Blue Analogs

- Synthesized with Reducing Sodium Salt for Enhanced Rate and Cycling Stability Sodium-Ion Storage, *ACS Appl. Mater. Interfaces* 17 (2025) 7870–7880. <https://doi.org/10.1021/acsami.4c20346>.
- [7] X. Zhang, Z. Xu, J. Xie, Y. Lu, S. Liu, X. Xu, J. Tu, B. Xu, X. Zhao, Nanoarchitectonics for a long-life and robust Na-ion battery at low temperature with Prussian blue cathode and low-concentration electrolyte, *Journal of Energy Storage* 80 (2024) 110263. <https://doi.org/10.1016/j.est.2023.110263>.
- [8] V. Shipitsyn, W. Zuo, T.-N. Tran, T. Li, S. Lee, C.M. Chak, P.M. Le, L. Ma, Electronic Structure and Safety Insights into Prussian Blue Analog Cathode Behavior at Elevated Temperatures in Sodium-Ion Batteries, *Energy Fuels* 39 (2025) 19054–19059. <https://doi.org/10.1021/acs.energyfuels.5c03083>.
- [9] X. Wang, M. Zhao, W. Du, C. Zhang, W. Li, C. Yang, Y. Liu, Boosting ultralong lifespan of Fe-based Prussian blue analogs cathode via element doping and crystal water capture, *Chemical Engineering Journal* 508 (2025) 160997. <https://doi.org/10.1016/j.cej.2025.160997>.
- [10] L. Xu, Y. Liu, M. Chen, W. Wu, S. Qiu, H. Wu, M. Zheng, X. Zhang, X. Wu, Suppressing vacancies and crystal water of sodium manganese iron-based Prussian blue analogue by potassium doping for advanced sodium-ion batteries, *Chemical Engineering Science* 302 (2025) 120848. <https://doi.org/10.1016/j.ces.2024.120848>.
- [11] K. Lin, Z. He, L. Shen, J. Su, Z. Huang, Y. Xia, Y. Wang, Zinc-substituted Fe-based Prussian blue analogues induce a weak Jahn-Teller effect to enhance stability of sodium ion batteries, *Journal of Energy Storage* 90 (2024) 111924. <https://doi.org/10.1016/j.est.2024.111924>.
- [12] X. Ding, Q. Zhou, Z. Wang, L. Liu, Y. Wang, T. Song, F. Wu, H. Gao, An ultra-stable Mn-

based Prussian blue compound effectively suppresses Jahn–Teller distortion as a superior cathode material for sodium-ion batteries, *J. Mater. Chem. A* 12 (2024) 27598–27609.  
<https://doi.org/10.1039/D4TA05525J>.
